# Supplementary material for: Evidence of Neutralizing and Non-Neutralizing Anti-Glucosaminidase Antibodies in Patients With S. Aureus Osteomyelitis and Their Association With Clinical Outcome Following Surgery in a Clinical Pilot
Source: PubMed Central journal article supplement (PMC9339635; doi:10.3389/fcimb.2022.876898), 2022-07-18

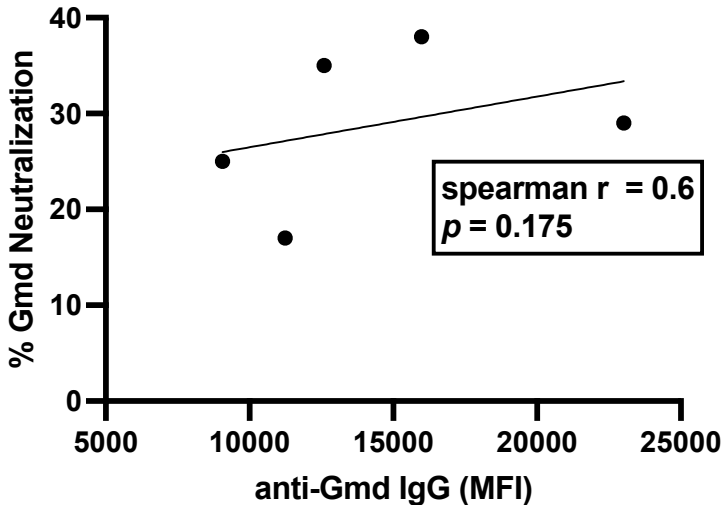

Supplement: Image_2.pdf [file Image_2.pdf]
